# Supplementary material
Source: Springer Nature journal article supplement (https://www.springermedizin.de/resource/supplementary/12958_2009_691_MOESM6_ESM.pdf/9568596)

□ Control    ■ siRNA    ■ EGF    ■ EGF+siRNA

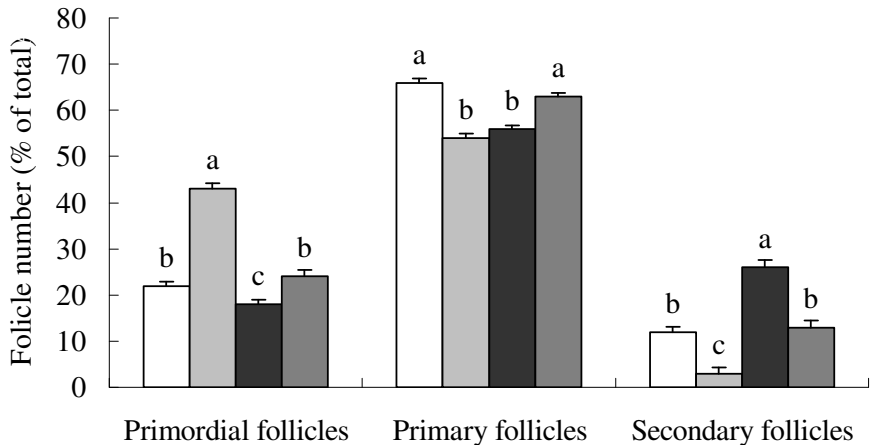

Supplement: MOESM6 [file 9568596]
